# Supplementary material
Source: MDPI journal article supplement (https://www.mdpi.com/2076-3263/10/9/365)
Supplement: s1 [file s1]

# Quantitative Analysis of Pore Space Structure in Dry and Wet Soil by Integral Geometry Methods

Dmitriy Ivonin <sup>1,\*</sup>, Timofey Kalnin <sup>2</sup>, Eugene Grachev <sup>1</sup> and Evgeny Shein <sup>2,3</sup>

<sup>1</sup> Faculty of Physics, Lomonosov Moscow State University, GSP-1, 1-2 Leninskie Gory, 119991 Moscow, Russia; ivonin.dmitriy@physics.msu.ru (D.I.); gracheva@gmail.com (E.G.)

<sup>2</sup> Soil Science Faculty, Lomonosov Moscow State University, 1–12 Leninskie Gory, 119991 Moscow, Russia; kremor1994@gmail.com (T.K.); evgeny.shein@gmail.com (E.S.)

<sup>3</sup> Dokuchaev Soil Science Institute, per. Pyzhevskii 7, 119017 Moscow, Russia; evgeny.shein@gmail.com (E.S.)

\* Correspondence: ivonin.dmitriy@physics.msu.ru (D.I.)

Received: date; Accepted: date; Published: date

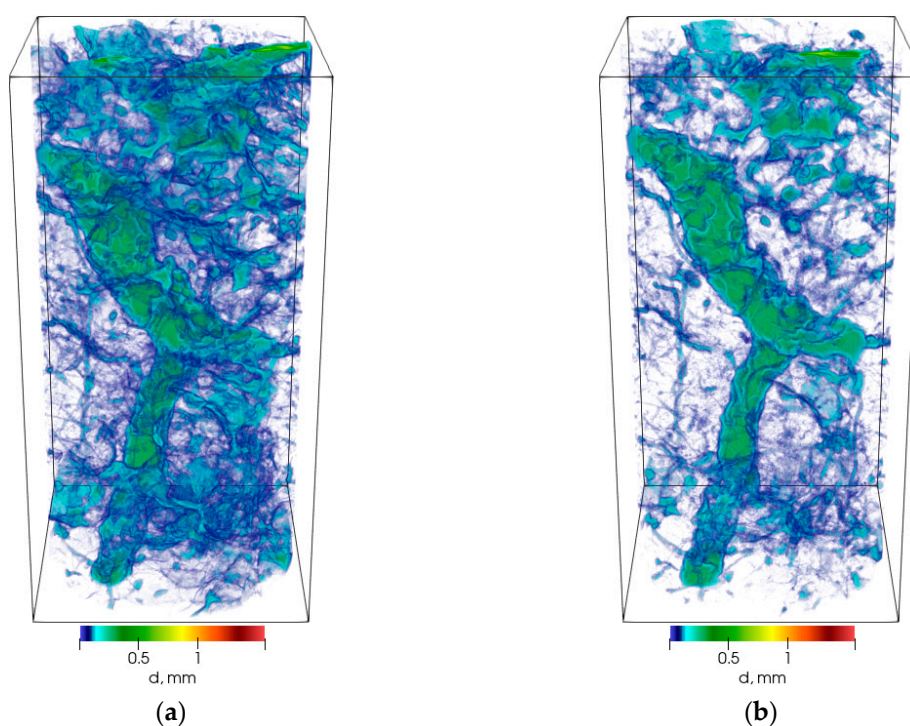

**Figure S1.** Void visualization of a sample which was taken from 0–10 cm depth from the Arable horizon: (a) in dry condition; (b) in moisture-saturated condition. The Euclidean distance to the solid phase is illustrated in color.

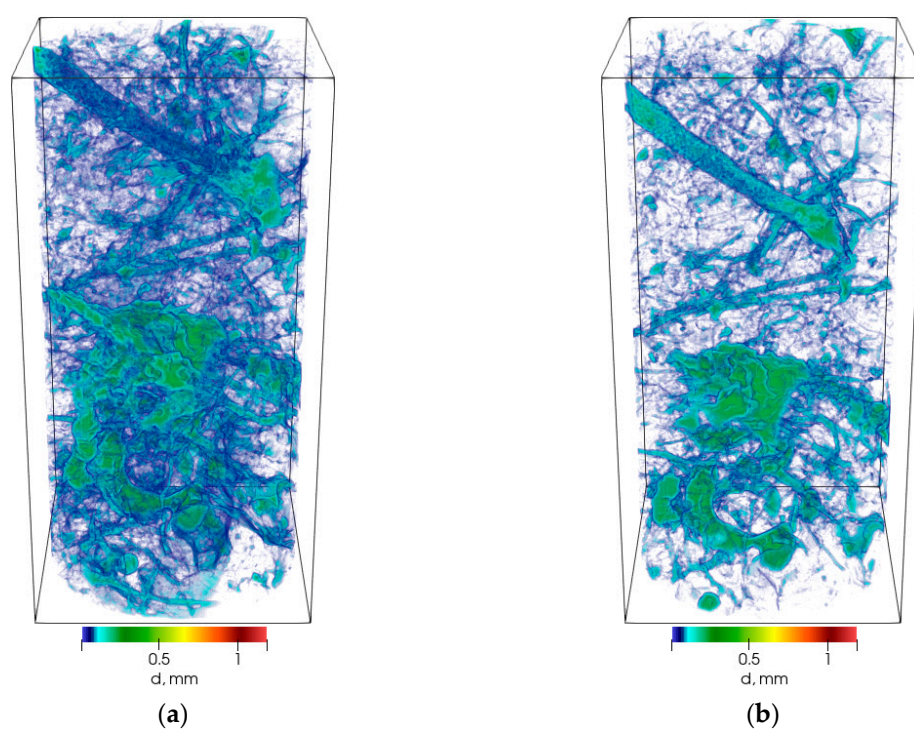

**Figure S2.** Void visualization of a sample which was taken from 0–10 cm depth from the Arable horizon: (a) in dry condition; (b) in moisture-saturated condition.

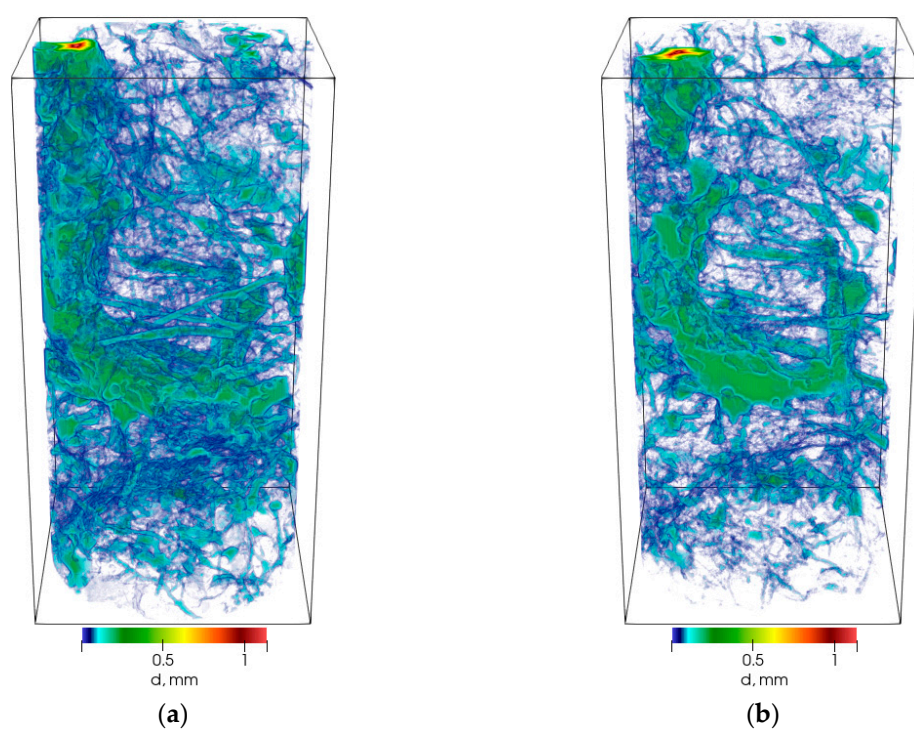

**Figure S3.** Void visualization of a sample which was taken from 0–10 cm depth from the Arable horizon: (a) in dry condition; (b) in moisture-saturated condition.

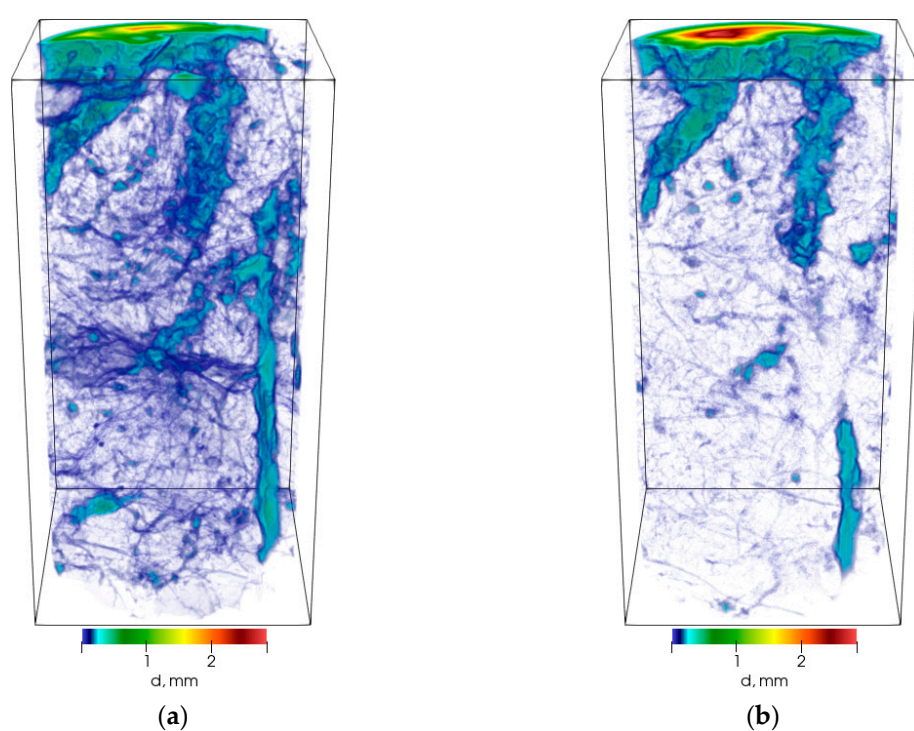

**Figure S4.** Void visualization of a sample which was taken from 10–20 cm depth from the Arable horizon: (a) in dry condition; (b) in moisture-saturated condition.

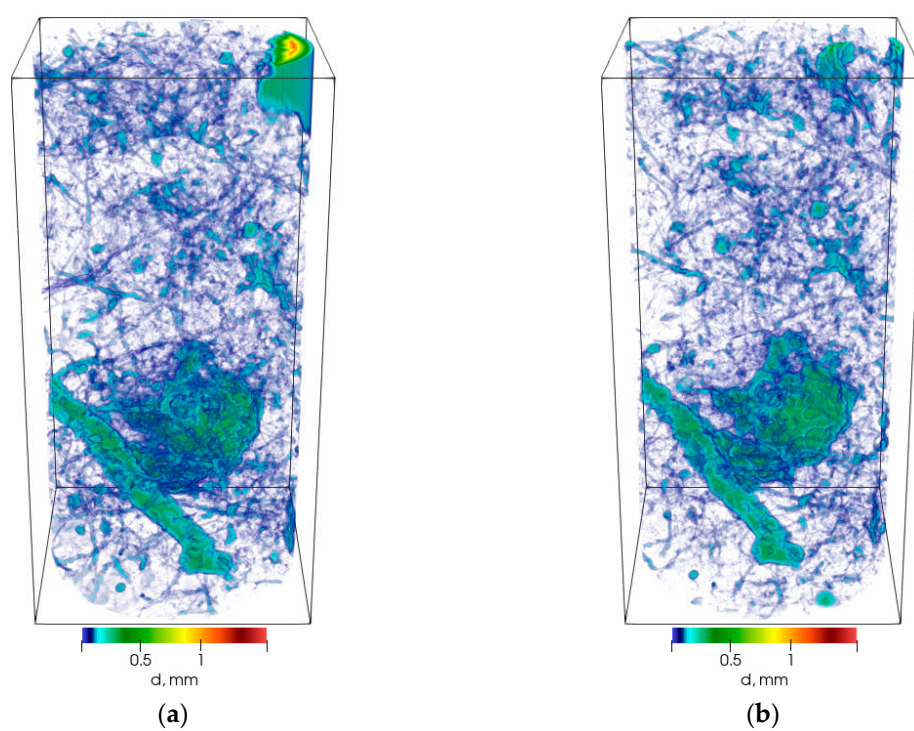

**Figure S5.** Void visualization of a sample which was taken from 10–20 cm depth from the Arable horizon: (a) in dry condition; (b) in moisture-saturated condition.



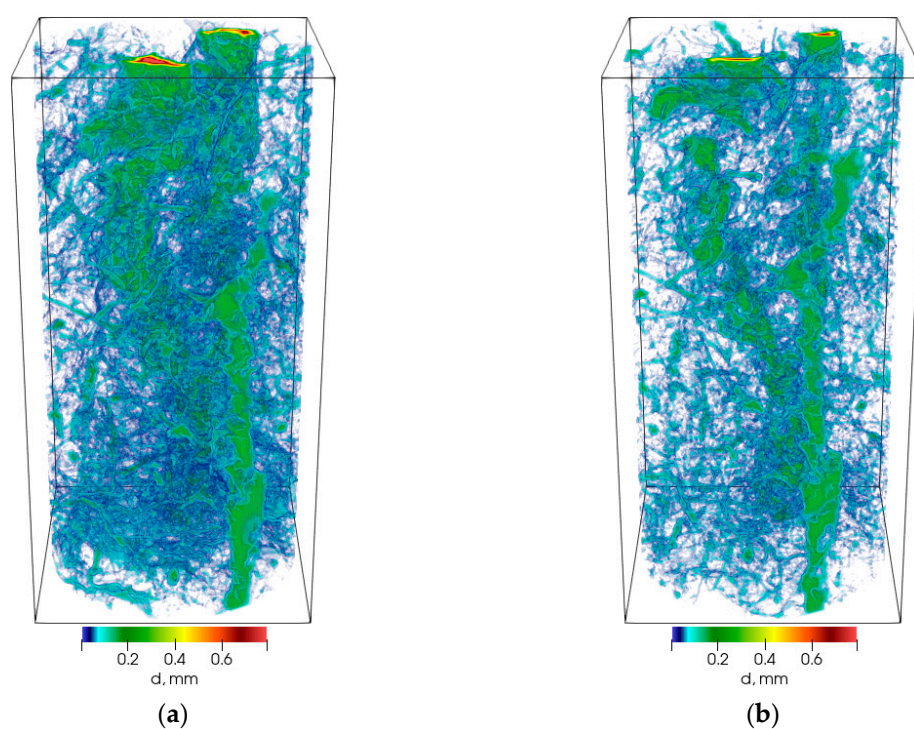

**Figure S6.** Void visualization of a sample which was taken from 20–30 cm depth from the A2 horizon: (a) in dry condition; (b) in moisture-saturated condition.

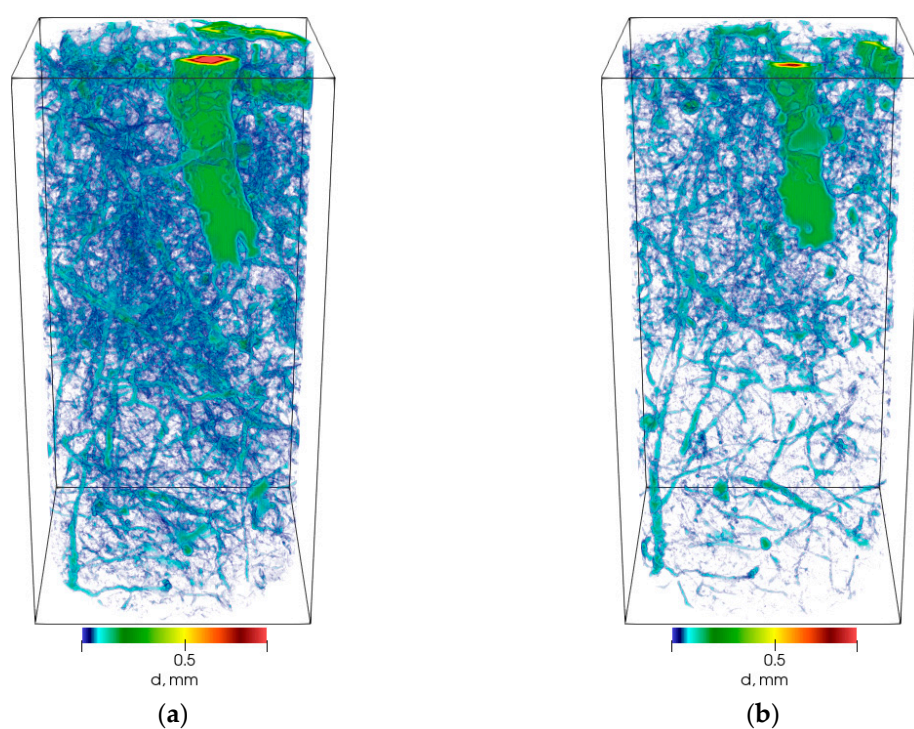

**Figure S7.** Void visualization of a sample which was taken from 20–30 cm depth from the A2 horizon: (a) in dry condition; (b) in moisture-saturated condition.

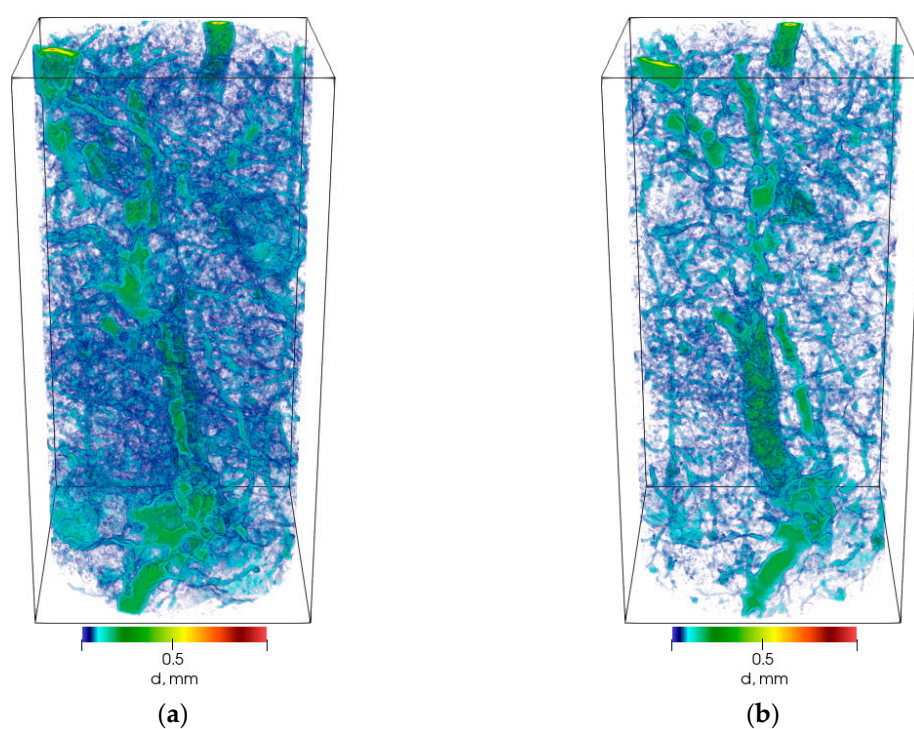

**Figure S8.** Void visualization of a sample which was taken from 30–40 cm depth from the A2 horizon: (a) in dry condition; (b) in moisture-saturated condition.

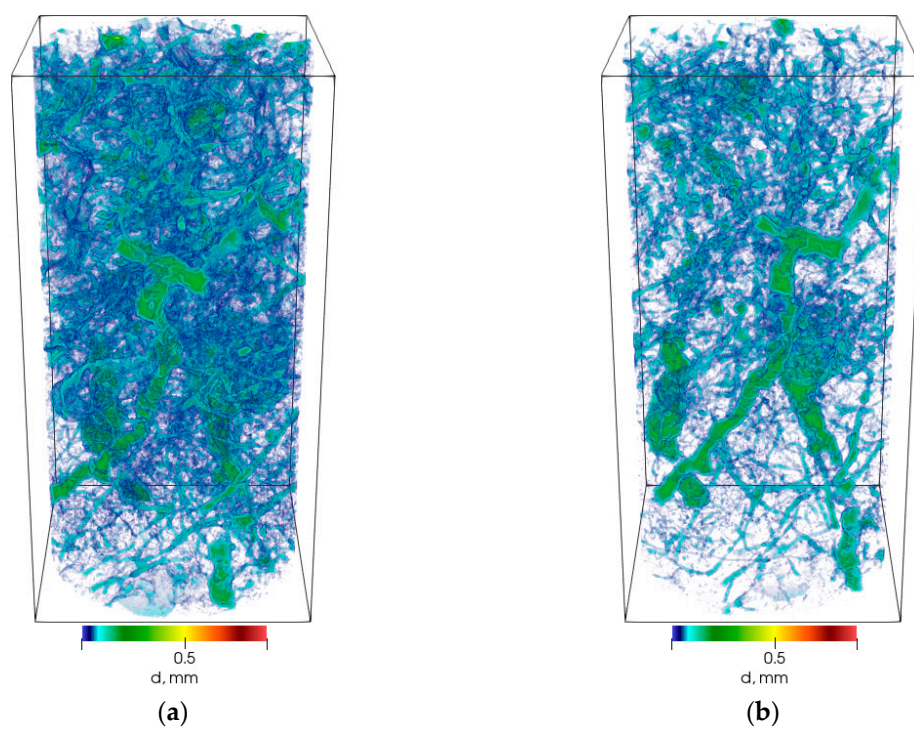

**Figure S9.** Void visualization of a sample which was taken from 30–40 cm depth from the A2 horizon: (a) in dry condition; (b) in moisture-saturated condition.



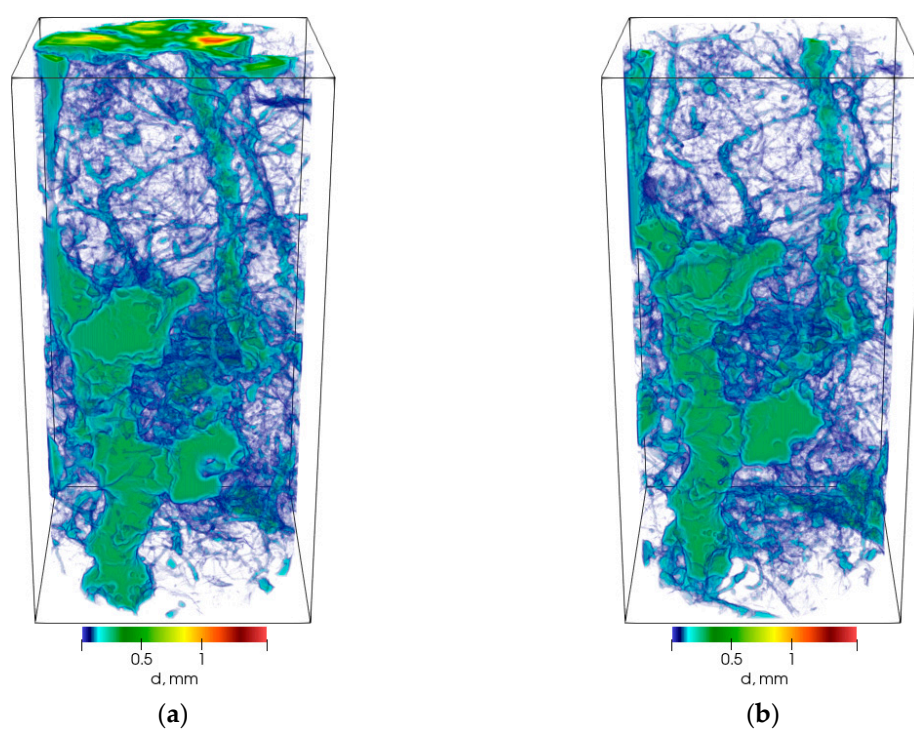

**Figure S10.** Void visualization of a sample which was taken from 40–50 cm depth from the AB horizon: (a) in dry condition; (b) in moisture-saturated condition.

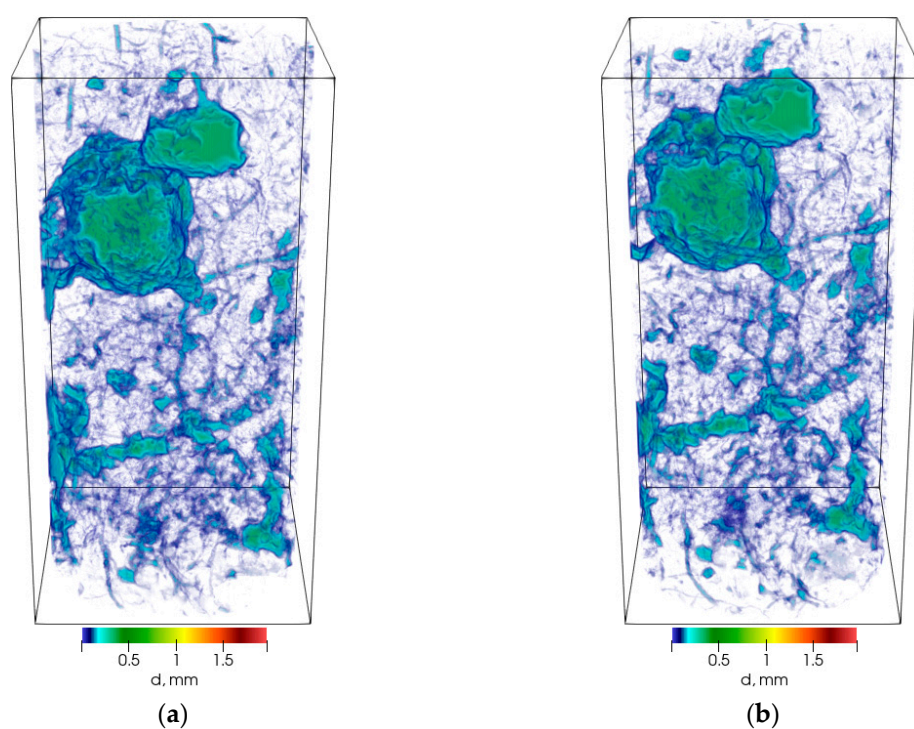

**Figure S11.** Void visualization of a sample which was taken from 80–90 cm depth from the B2 horizon: (a) in dry condition; (b) in moisture-saturated condition.

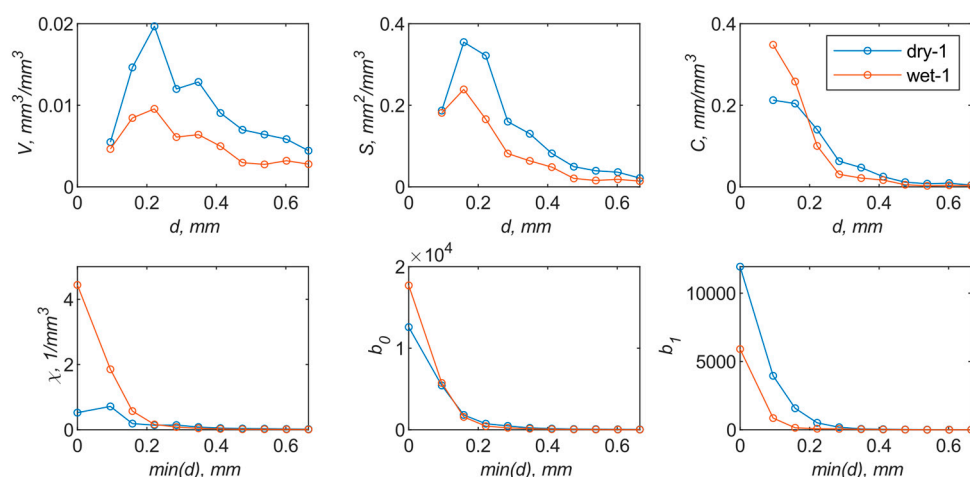

**Figure S12.** Distribution of pore characteristics as a function of pore sizes for a sample from Arable horizon in the 0–10 cm depth in a dry condition (blue color) and in wet condition (red color). The values  $V, S, C$  are represented by non-cumulative pores sizes distribution, whereas  $\chi, b_0, b_1$  values are presented versus the minimum pore diameter. The minimum pore diameter corresponds to the diameter of the spherical structural unit used for morphological opening.

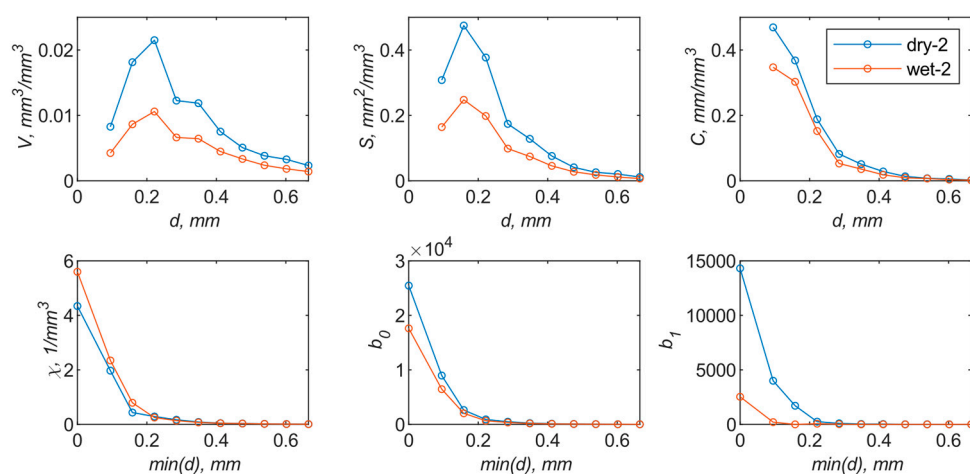

**Figure S13.** Distribution of pore characteristics as a function of pore sizes for a sample from Arable horizon in the 0–10 cm depth in a dry condition (blue color) and in wet condition (red color). The values  $V, S, C$  are represented by non-cumulative pores sizes distribution, whereas  $\chi, b_0, b_1$  values are presented versus the minimum pore diameter. The minimum pore diameter corresponds to the diameter of the spherical structural unit used for morphological opening.

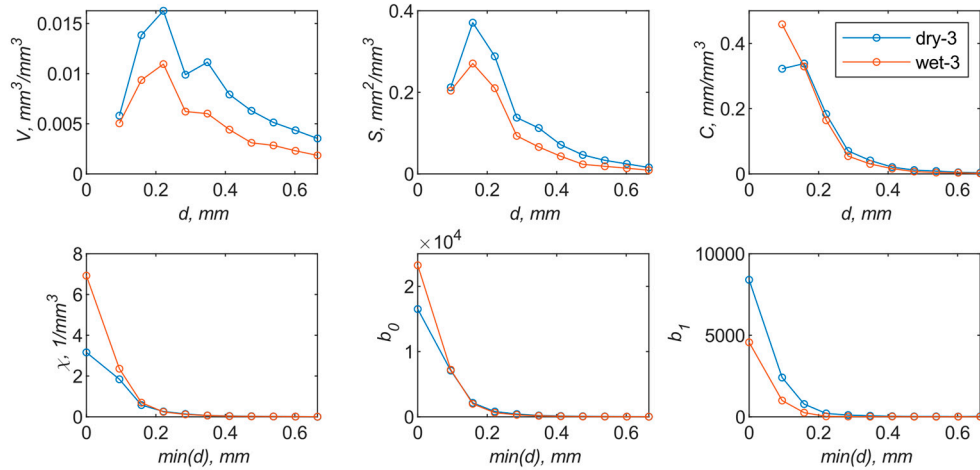

**Figure S14.** Distribution of pore characteristics as a function of pore sizes for a sample from Arable horizon in the 0–10 cm depth in a dry condition (blue color) and in wet condition (red color). The values  $V, S, C$  are represented by non-cumulative pores sizes distribution, whereas  $\chi, b_0, b_1$  values are presented versus the minimum pore diameter. The minimum pore diameter corresponds to the diameter of the spherical structural unit used for morphological opening.

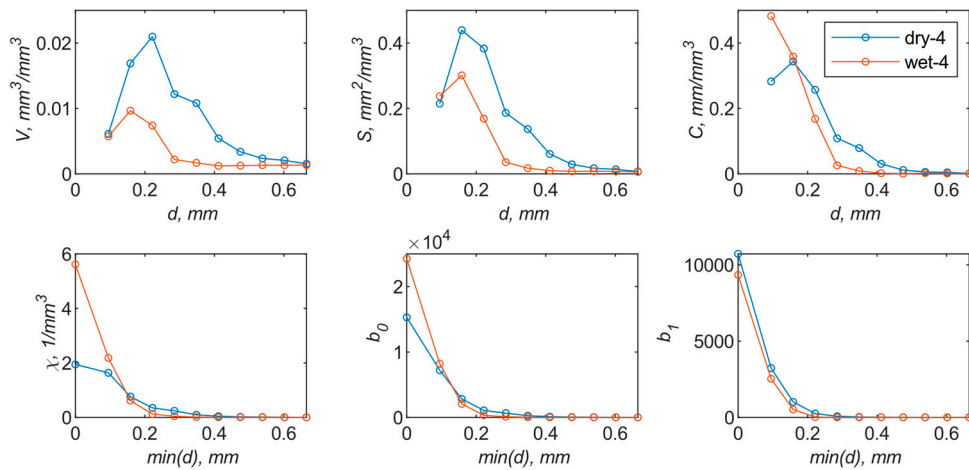

**Figure S15.** Distribution of pore characteristics as a function of pore sizes for a sample from Arable horizon in the 10–20 cm depth in a dry condition (blue color) and in wet condition (red color). The values  $V, S, C$  are represented by non-cumulative pores sizes distribution, whereas  $\chi, b_0, b_1$  values are presented versus the minimum pore diameter. The minimum pore diameter corresponds to the diameter of the spherical structural unit used for morphological opening.



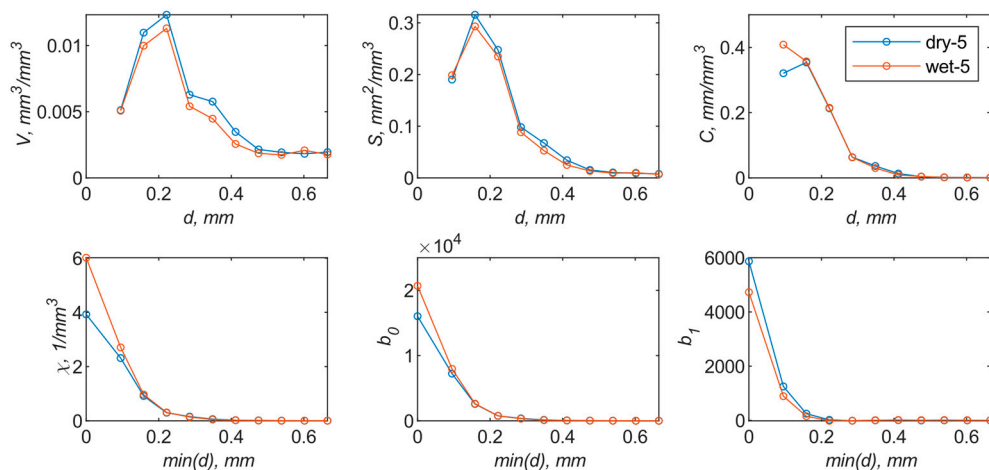

**Figure S16.** Distribution of pore characteristics as a function of pore sizes for a sample from Arable horizon in the 10–20 cm depth in a dry condition (blue color) and in wet condition (red color). The values  $V, S, C$  are represented by non-cumulative pores sizes distribution, whereas  $\chi, b_0, b_1$  values are presented versus the minimum pore diameter. The minimum pore diameter corresponds to the diameter of the spherical structural unit used for morphological opening.

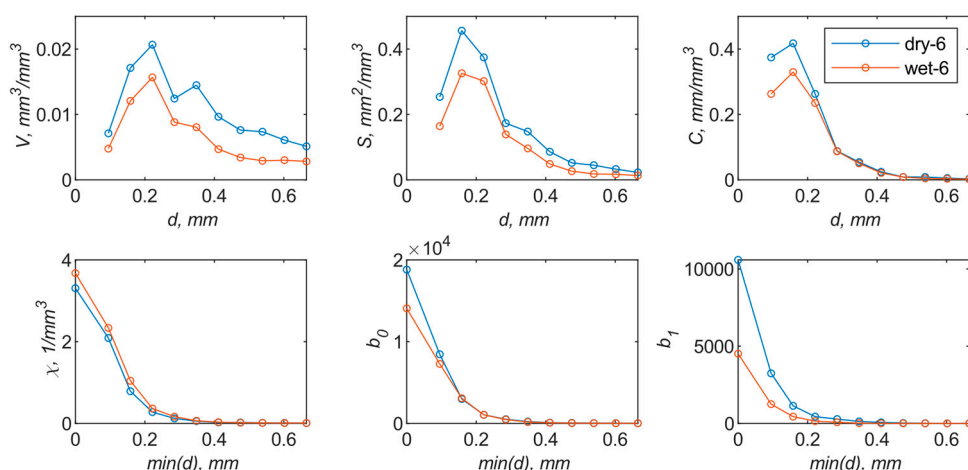

**Figure S17.** Distribution of pore characteristics as a function of pore sizes for a sample from A2 horizon in the 20–30 cm depth in a dry condition (blue color) and in wet condition (red color). The values  $V, S, C$  are represented by non-cumulative pores sizes distribution, whereas  $\chi, b_0, b_1$  values are presented versus the minimum pore diameter. The minimum pore diameter corresponds to the diameter of the spherical structural unit used for morphological opening.

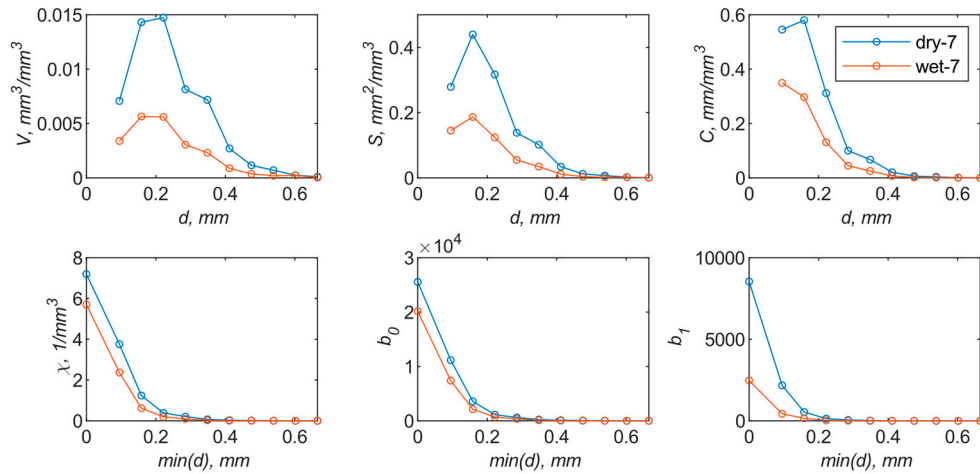

**Figure S18.** Distribution of pore characteristics as a function of pore sizes for a sample from A2 horizon in the 20–30 cm depth in a dry condition (blue color) and in wet condition (red color). The values  $V, S, C$  are represented by non-cumulative pores sizes distribution, whereas  $\chi, b_0, b_1$  values are presented versus the minimum pore diameter. The minimum pore diameter corresponds to the diameter of the spherical structural unit used for morphological opening.

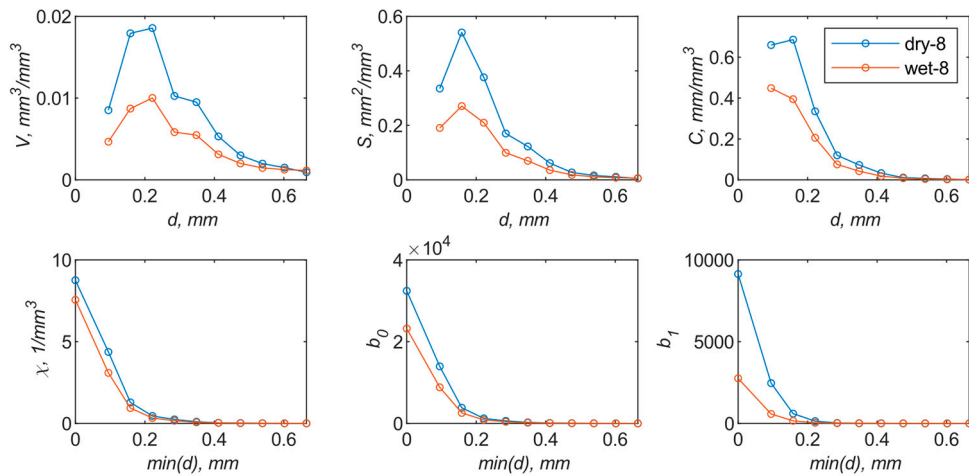

**Figure S19.** Distribution of pore characteristics as a function of pore sizes for a sample from A2 horizon in the 30–40 cm depth in a dry condition (blue color) and in wet condition (red color). The values  $V, S, C$  are represented by non-cumulative pores sizes distribution, whereas  $\chi, b_0, b_1$  values are presented versus the minimum pore diameter. The minimum pore diameter corresponds to the diameter of the spherical structural unit used for morphological opening.

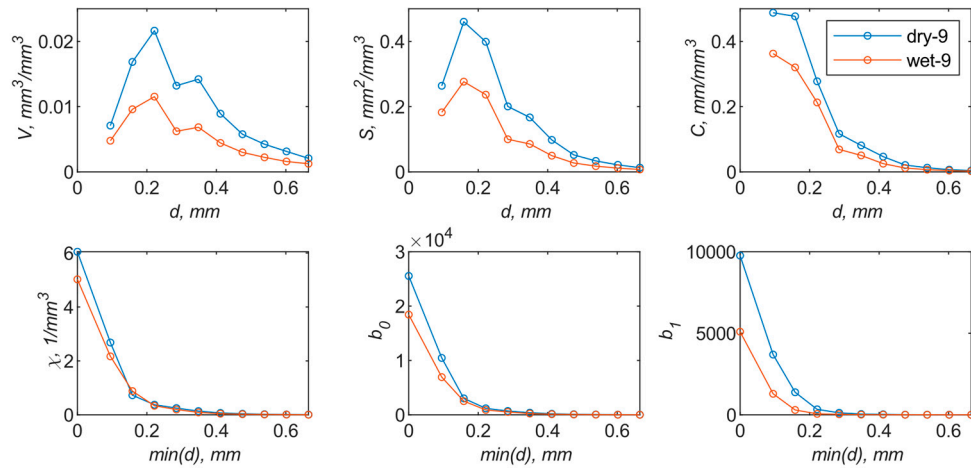

**Figure S20.** Distribution of pore characteristics as a function of pore sizes for a sample from A2 horizon in the 30–40 cm depth in a dry condition (blue color) and in wet condition (red color). The values  $V, S, C$  are represented by non-cumulative pores sizes distribution, whereas  $\chi, b_0, b_1$  values are presented versus the minimum pore diameter. The minimum pore diameter corresponds to the diameter of the spherical structural unit used for morphological opening.

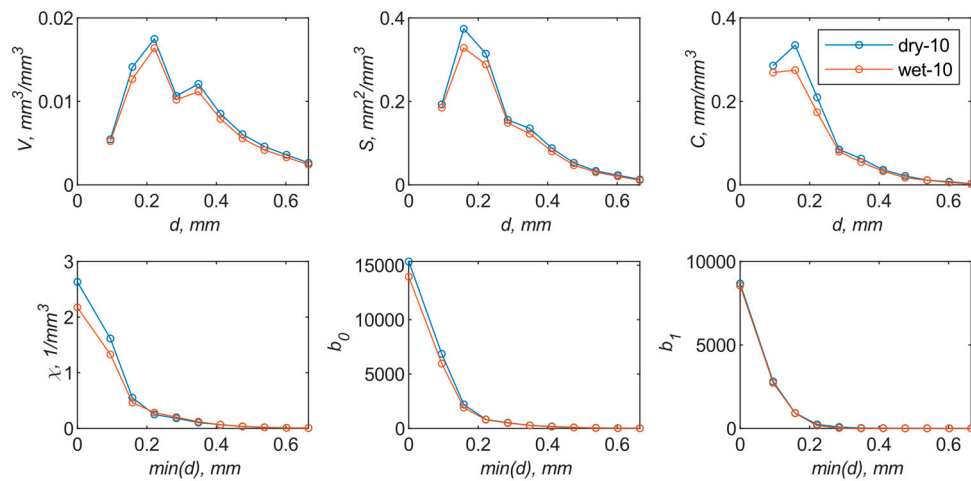

**Figure S21.** Distribution of pore characteristics as a function of pore sizes for a sample from AB horizon in the 40–50 cm depth in a dry condition (blue color) and in wet condition (red color). The values  $V, S, C$  are represented by non-cumulative pores sizes distribution, whereas  $\chi, b_0, b_1$  values are presented versus the minimum pore diameter. The minimum pore diameter corresponds to the diameter of the spherical structural unit used for morphological opening.



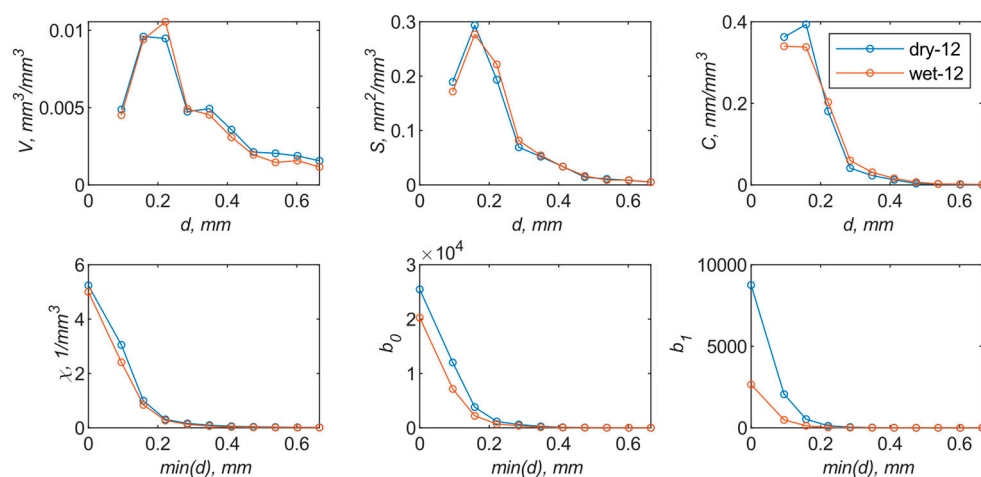

**Figure S22.** Distribution of pore characteristics as a function of pore sizes for a sample from B2 horizon in the 80–90 cm depth in a dry condition (blue color) and in wet condition (red color). The values  $V, S, C$  are represented by non-cumulative pores sizes distribution, whereas  $\chi, b_0, b_1$  values are presented versus the minimum pore diameter. The minimum pore diameter corresponds to the diameter of the spherical structural unit used for morphological opening.
